# Supplementary figures and images for: Functional characteristics of glaucoma related arcuate defects seen on OCT en face visualisation of the retinal nerve fibre layer
Source: PubMed Central journal article supplement — Ophthalmic Physiol Opt. 2021 Jan 25;41(2):437–46. doi: 10.1111/opo.12780 (PMC8248257; doi:10.1111/opo.12780), 2021-01-25

Subject 1

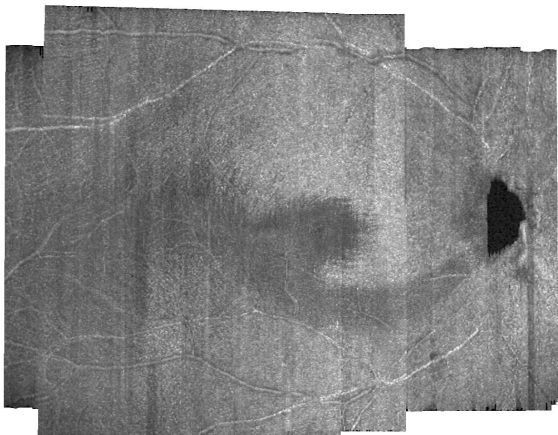

Subject 2

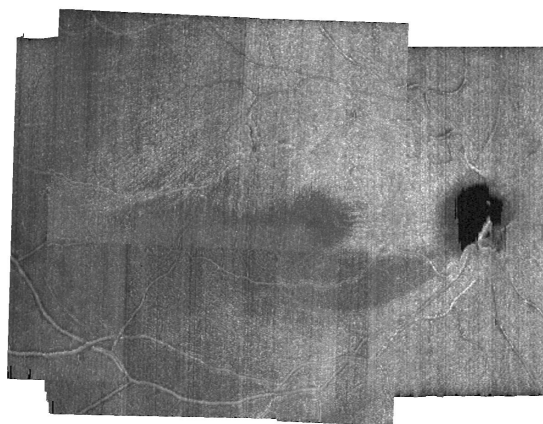

Subject 3

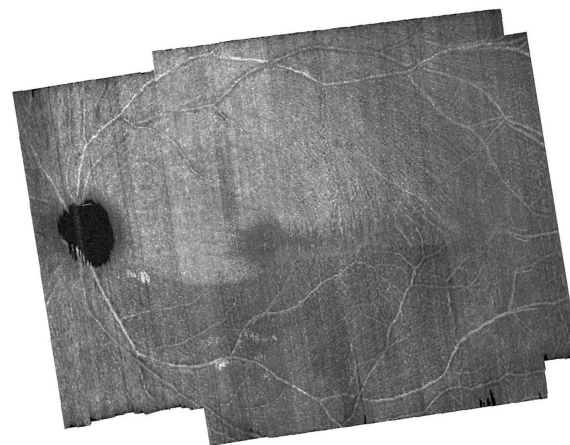

Subject 4

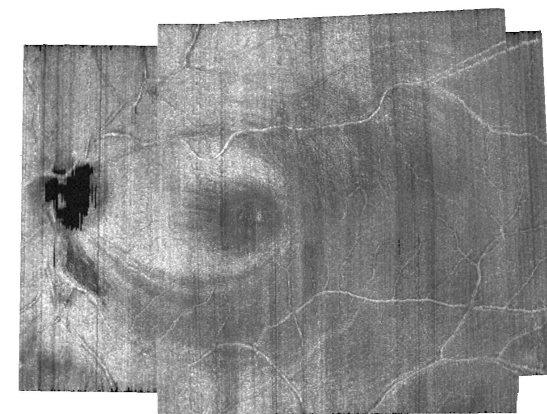

Subject 5

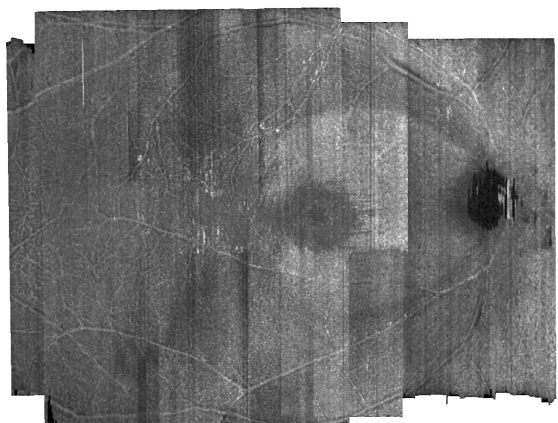

Subject 6

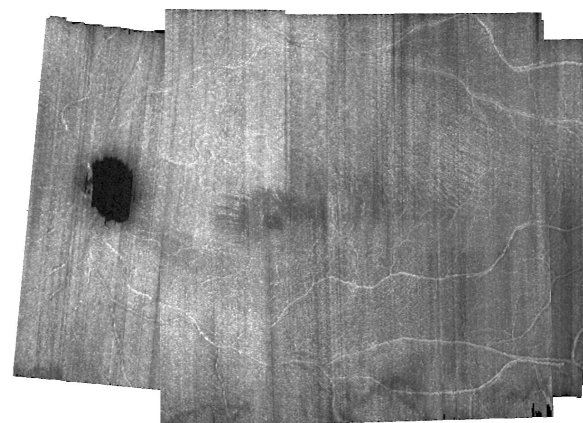

Subject 7

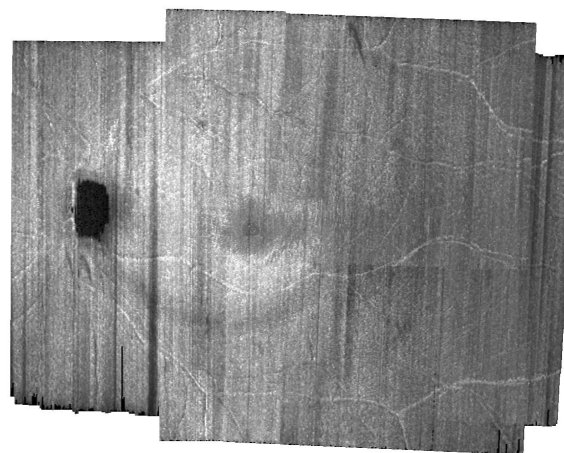

5°

Supplement: OPO-41-437-s001.pdf [file OPO-41-437-s001.pdf]

A)

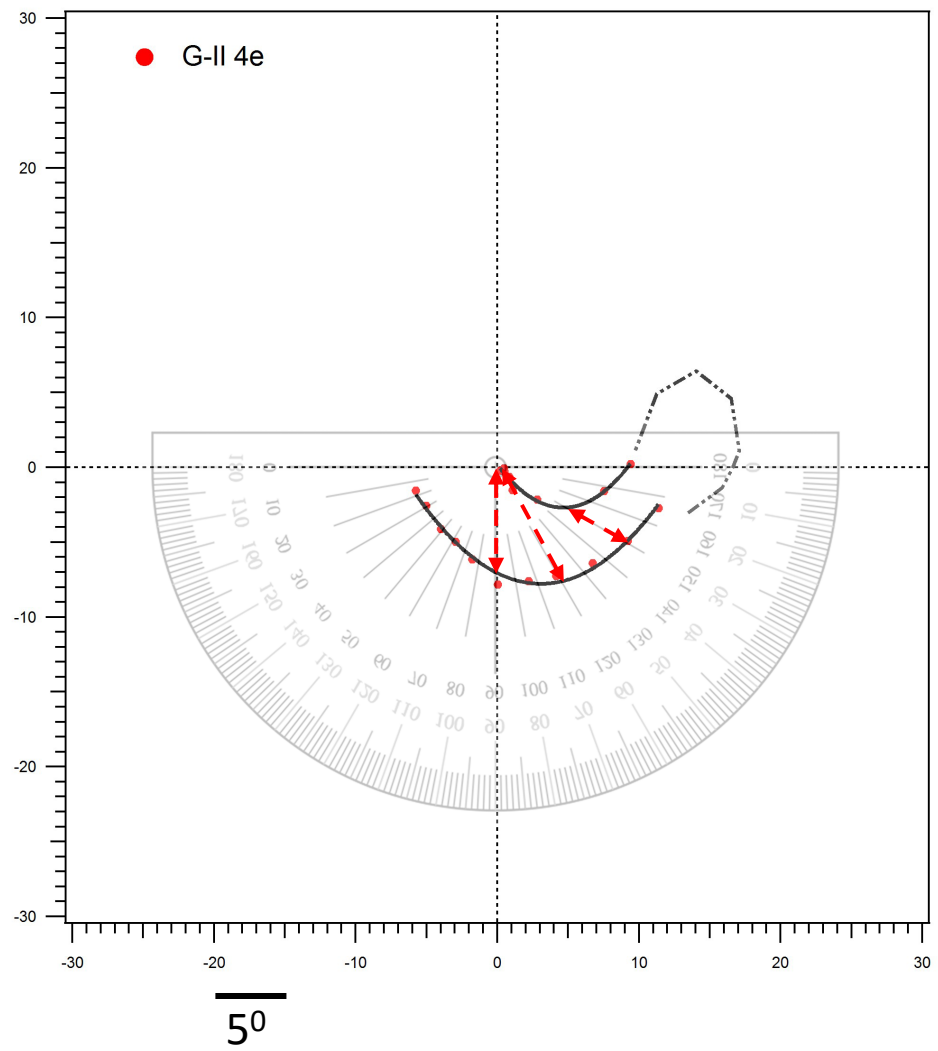

B)

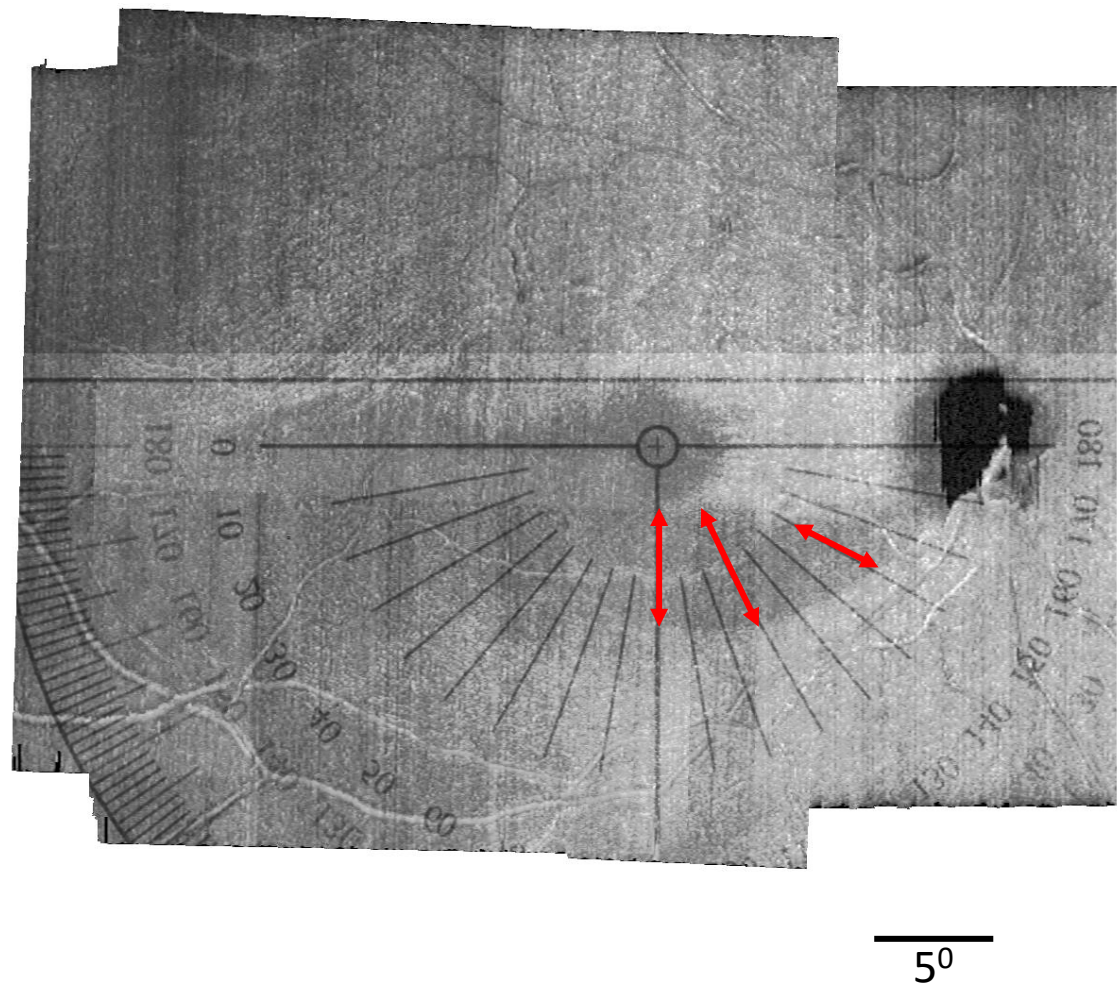

Supplement: OPO-41-437-s002.pdf [file OPO-41-437-s002.pdf]
